# Supplementary material for: A proton conductive hydrogen-bonded framework incorporating 18-crown-6-ether and dicarboxy-o-terphenyl moieties
Source: Royal Society of Chemistry journal article supplement (doi:10.1039/d1ma00411e), 2021-01-01
Supplement: d1ma00411e1.pdf [file d1ma00411e1.pdf]

**Electronic Supplemental Information**  
**for**  
**A proton conductive hydrogen-bonded framework incorporating**  
**18-crown-6-ether and dicarboxy-*o*-terphenyl moieties**

Xin Chen,<sup>a</sup> Kiyonori Takahashi,<sup>a,b\*</sup> Kenta Kokado,<sup>a,b</sup> Takayoshi Nakamura,<sup>a,b\*</sup> Ichiro Hisaki<sup>a,b,c\*</sup>

<sup>a</sup> Graduate School of Environmental Science, Hokkaido University, N10W5, Kita-ku, Sapporo 060-0810, Japan.

<sup>b</sup> Research Institute for Electronic Science (RIES), Hokkaido University, N20W10, Kita-ku, Sapporo, 001-0020, Japan

<sup>c</sup> Graduate School of Engineering Science, Osaka University, 1-3, Machikaneyama, Toyonaka, Osaka, 560-8531, Japan

**Contents.**

**Section 1. General**

**Section 2. Synthesis of Compounds**

**Section 3. Crystallography**

**Section 4. Impedance Spectroscopy**

**Section 5. <sup>1</sup>H and <sup>13</sup>C NMR Spectra**

**Section 6. References**

## 1. General

**Materials.** All the chemicals used as starting materials, reagents and solvents were purchased from commercial suppliers and used as received without further purification. Analytical thin layer chromatography (TLC) was carried out on aluminum sheets coated with silica gel (Kieselgel 60F<sub>254</sub>, Merck). Column chromatographic purifications were performed using silica gel (63-200  $\mu\text{m}$ , Merck and 64-210  $\mu\text{m}$ , Wakosil.). Unless stated otherwise, reported yields refer to analytically pure samples.

**Spectroscopy.** Nuclear magnetic resonance (NMR) spectra were recorded in  $\text{CDCl}_3$  on AV 400 MHz JEOL ECX-400 NMR spectrometers. Chemical shifts are reported in  $\delta$  ppm relative to solvent peak ( $^1\text{H}$  NMR:  $\delta$  7.26 ppm and 2.50 ppm for  $\text{CDCl}_3$  and  $\text{DMSO}-d_6$ , respectively;  $^{13}\text{C}$  NMR:  $\delta$  77.16 ppm and 39.52 ppm for  $\text{CDCl}_3$  and  $\text{DMSO}-d_6$ , respectively) with peak multiplicities described as singlet (s), broad singlet (br. s), doublet (d), triplet (t), quartet (q) and multiplet (m) in  $^1\text{H}$  NMR spectra.

**Thermal Stability.** Thermogravimetric analysis (TGA) was conducted using a Rigaku Thermo Plus TG8120 with a heating rate of 5 K/min under nitrogen.

**Powder X-Ray Diffraction Patterns (PXRD).** PXRD were measured with a Rigaku RINT2100 in the  $2\theta$  region of 5 - 50°. The measurements were performed with  $\text{Cu } K_\alpha$  radiation ( $\lambda = 1.5418 \text{ \AA}$ ) at scanning rate of  $1.2^\circ \cdot \text{min}^{-1}$  under an applied electric voltage and current of 40 KV and 40 mA, respectively.

**Crystal Structure Determination.** Single crystalline X-ray diffraction data was collected by Rigaku MicroMax-007HF diffractometer with a Pilatus 200K detector and  $\text{Cu } K_\alpha$  radiation ( $\lambda = 1.54184 \text{ \AA}$ ) at 223 K. Analytical and multi-scan absorption corrections were applied to the reflection data. A single crystal was mounted on MicroMounts<sup>TM</sup> tip (MiTeGen) with Paratone<sup>®</sup> 8277 (Hampton Research). Data collection, cell refinement, and data reduction were carried out with CrysAlis<sup>PRO</sup> (Rigaku Oxford Diffraction, 2017). The initial structure was solved by using SHELXT, and structural refinement was performed by using full-matrix least-squares techniques on  $F^2$  using Crystal structure software (Rigaku). Anisotropic refinement was applied to all atoms except for hydrogens. SQUEEZE function equipped in the PLATON program was used to remove severely disordered solvent molecules in voids. These data are provided free of charge in The Cambridge Crystallographic Data Centre (CCDC-2057700, 2078832, 2078834, 2078835).

**Impedance Spectroscopy under humid condition.** Frequency-dependent impedance spectra were measured using an impedance analyzer 4294A (Agilent) with four-probe AC impedance method at a frequency range from  $10^{2.5}$  to  $10^6$  Hz. The crystalline sample was powdered with agate milk stick and pelletized with a shaper. Gold paste (No. 8556, Tokuriki Chemical Research Co., Ltd.) and 30  $\mu\text{m}$   $\phi$  gold wires (Nilaco Corp.) were used for electrical contacts between sample and electrical wire from the device. Temperature was controlled by water bath with pipe heater (AW-1105, Hakko Electric

Co.,Ltd) and temperature controller (TC-3000A, As One). The impedance was measured in a closed glass cell containing a saturated KCl solution and humidity was monitored by humidity sensor (SHT31-DIS, Senserion). Data fitting is carried out by using EIS Spectrum Analyser.

## Section 2. Synthesis of compounds

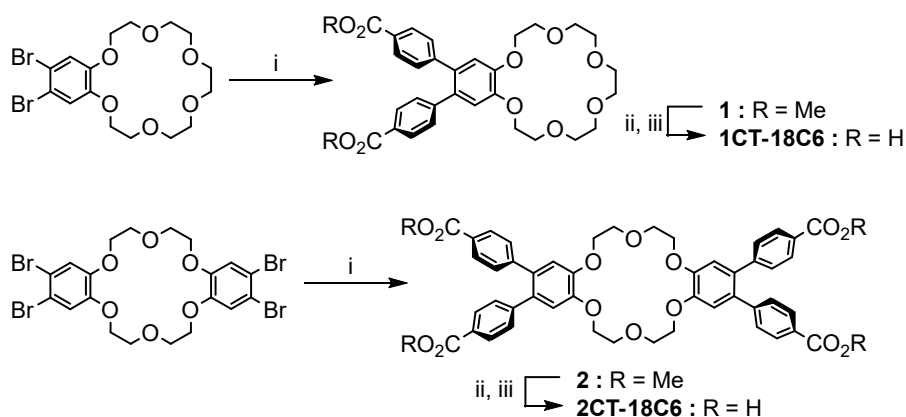

**Scheme S1.** Synthesis of **1CT-18C6** and **2CT-18C6**. Reaction conditions: i) 4-(methoxycarbonyl)phenylboronic acid,  $\text{Pd}(\text{PPh}_3)_4$ ,  $\text{K}_2\text{CO}_3$ , THF, water, reflux; ii)  $\text{NaOH}_{\text{aq}}$ , THF, iii)  $\text{HCl}$ .

**4,5-Dibromodibenzo-18-crown-6.**<sup>[S1]</sup> Benzo[18]crown-6 ether (2.00 g, 6.40 mmol) was dissolved in acetic acid (80 ml). Bromine (5.00 g, 31.3 mmol) was added to the solution, and the mixture was stirred for 12 h at 85 °C. After cooling the solution, the orange powder was filtered and washed with water,  $\text{Na}_2\text{S}_2\text{O}_3(\text{aq})$ , MeOH (two times for each) to give 4,5-Dibromodibenzo-18-crown-6 (2.43 g, 81%) as a white solid.

$^1\text{H}$  NMR (400 MHz,  $\text{CDCl}_3$ ):  $\delta$  7.07 (s, 2H), 4.12 (d,  $J = 5.7$  Hz, 4H), 3.92 (d,  $J = 5.6$  Hz, 4H), 3.77 (d,  $J = 6.0$  Hz, 4H), 3.76-3.64 (m, 8H);  $^{13}\text{C}$  NMR: (100 MHz,  $\text{CDCl}_3$ ):  $\delta$  148.56, 118.17, 115.37, 70.93, 70.74, 70.69, 69.40, 69.24 ppm.

**4,5-Dibenzoic ester benzo-18-crown-6 derivative 1.** 4,5-dibromobenzo-18-crown-6 (0.80 g, 1.7 mmol),  $\text{K}_2\text{CO}_3$  (0.71 g, 5.1 mmol) and  $\text{Pd}(\text{PPh}_3)_4$  (0.13 g, 0.11 mmol) were dissolved in THF (100 ml) and stirred for 15 min. 4-methoxycarbonylphenyl boronic acid (0.92 g, 5.1 mmol), dissolved in methanol (30 ml), was added to the solution and stirred for 48 h under reflux condition. After being cooled to the room temperature, the mixture was concentrated in a rotary evaporator, extracted with chloroform, washed with water and dried over anhydrous  $\text{MgSO}_4$ . The product was purified with column chromatography (silica gel, chloroform) to give **1** (0.71 g, 72%) as a white solid.

<sup>1</sup>H NMR (400 MHz, CDCl<sub>3</sub>): δ 7.84 (d, *J* = 8.4 Hz, 4H), 7.13 (d, *J* = 8.4 Hz, 4H), 6.93 (s, 2H), 4.27-4.20 (m, 4H), 3.98-3.89 (m, 4H), 3.88 (s, 6H), 3.82-3.66 (m, 12H) ppm; <sup>13</sup>C NMR: (100 MHz, CDCl<sub>3</sub>): δ 166.99, 148.60, 145.84, 132.58, 129.99, 129.41, 128.24, 115.60, 69.91, 69.10, 52.15.

**1CT-18C6.** To a solution of **1** (0.70 g, 1.2 mmol) dissolved in THF (20 ml) was added 10% NaOH<sub>aq</sub> (10 ml). After stirred at 65 °C for 48 h, 6 M HCl aqueous solution was added to the organic layer until it became neutral. The product was collected by centrifugation, washed with water for three time, and dried in vacuo to give **1CT-18C6** (0.51 g, 77 %) as a white solid.

<sup>1</sup>H NMR(400 MHz, DMSO): δ 7.74 (d, *J* = 7.9 Hz, 4H), 7.17 (d, *J* = 7.9 Hz, 4H), 7.00 (s, 2H), 4.21-4.14 (m, 4H), 3.75 (d, *J* = 5.9 Hz, 4H) , 3.60-3.56 (m, 4H) , 3.53 (d, *J* = 5.9 Hz, 4H) , 3.50 (s, 4H) ppm; <sup>13</sup>C NMR: (100 MHz, DMSO-*d*<sub>6</sub>) δ 167.7, 148.4, 145.7, 132.0, 130.5, 129.6, 129.4, 115.3, 70.29, 70.25, 69.1, 68.6 ppm; ESI-MS *m/z* calc. for [M]<sup>+</sup> C<sub>30</sub>H<sub>32</sub>O<sub>10</sub>: 552.19; found: 552.20.

**4,4',5,5'-Tetrabromodibenzo-18-crown-6.**<sup>[S1]</sup> Dibenzo[18]crown-6 ether (1.61 g, 4.47 mmol) was dissolved in acetic acid (50 ml). Bromine (5.00 g, 31.3 mmol) was added to the solution, and the mixture was stirred for 12 h at 85 °C. After cooling the solution, the orange powder was filtered and washed with water, Na<sub>2</sub>S<sub>2</sub>O<sub>3</sub>(aq), MeOH (two times for each) to give 4,4',5,5'-tetrabromodibenzo-18-crown-6 (2.61 g, 86%) as white residue.

<sup>1</sup>H NMR (400 MHz, CDCl<sub>3</sub>): 7.03 (s, 4H), 4.08 (s, 8H), 3.96 (s, 8H). <sup>13</sup>C NMR (100 MHz, CDCl<sub>3</sub>): δ 148.67, 117.95, 115.21, 69.72, 69.08 ppm.

**4,4',5,5'-Terabenzoic ester dibenzo-18-crown-6 derivative 2.** 4,4',5,5'-tetrabromodibenzo-18-crown-6 (4.05 g, 5.99 mmol), K<sub>2</sub>CO<sub>3</sub> (4.16 g, 30.10 mmol) and Pd(PPh<sub>3</sub>)<sub>4</sub> (0.47 g, 0.41 mmol) were dissolved in THF (100 ml) and stirred for 15 min. 4-methoxycarbonylphenyl boronic acid (5.39 g, 30.0 mmol), dissolved in methanol (50 ml), was added to the solution and stirred for 48 h under reflux condition. After being cooled to the room temperature, the mixture was concentrated in a rotary evaporator, extracted with chloroform, washed with water and dried over anhydrous MgSO<sub>4</sub>. The product was purified with column chromatography (silica gel, chloroform) to give **2** (4.11 g, 76%) as a white solid.

<sup>1</sup>H NMR (400 MHz, CDCl<sub>3</sub>): δ 7.85 (d, *J* = 8.4 Hz, 8H), 7.13 (d, *J* = 8.4 Hz, 8H), 6.94 (s, 4H), 4.26 (t, *J* = 4.5 Hz, 8H), 4.07 (t, *J* = 4.6 Hz, 8H), 3.88 (s, 12H) ppm; <sup>13</sup>C NMR: (100 MHz, CDCl<sub>3</sub>) δ 167.02, 148.71, 145.82, 132.71, 130.00, 129.44, 128.27, 115.97, 70.03, 69.31, 52.19 ppm.

**2CT-18C6.** To a solution of **2** (1.07 g, 1.19 mmol) dissolved in THF (30 ml) was added 10 % NaOH<sub>aq</sub> (10 ml). After stirred at 60 °C for 48 h, 6 M HCl aqueous solution was added to the organic layer until it became neutral. The product was collected by centrifugation, washed with water for three time, and dried in vacuo to give **2CT-18C6** (0.73 g, 73 %) as a white solid.

<sup>1</sup>H NMR(400 MHz, DMSO-*d*<sub>6</sub>): δ 7.75 (d, *J* = 7.9 Hz, 8H), 7.19 (d, *J* = 7.9 Hz, 8H), 7.00 (s, 4H), 4.22-

4.14 (m, 8H), 3.89-3.85 (m, 8H) ppm;  $^{13}\text{C}$  NMR: (100 MHz, DMSO- $d_6$ )  $\delta$  167.67, 147.93, 145.76, 131.89, 130.52, 129.60, 129.23, 114.43, 69.13, 68.09 ppm; ESI-MS  $m/z$  calc. for  $[\text{M}+\text{Na}]^+$   $\text{C}_{48}\text{H}_{40}\text{O}_{14}$ : 840.22; found: 840.24.

### Section 3. Crystallography

**Table S1.** Crystallographic parameters of **1CT-18C6** and **2CT-18C6**.

|                                                                                                                                                                                                                                                                                                                                           | <b>1CT-18C6-I</b>                               | <b>2CT-18C6-I</b>                                                         | <b>2CT-18C6-II</b>                                               | <b>2CT-18C6-III</b>                             |
|-------------------------------------------------------------------------------------------------------------------------------------------------------------------------------------------------------------------------------------------------------------------------------------------------------------------------------------------|-------------------------------------------------|---------------------------------------------------------------------------|------------------------------------------------------------------|-------------------------------------------------|
| Empirical formula                                                                                                                                                                                                                                                                                                                         | C <sub>30</sub> H <sub>36</sub> O <sub>13</sub> | C <sub>58.5</sub> H <sub>64.5</sub> N <sub>3.5</sub> Na O <sub>17.5</sub> | C <sub>57</sub> H <sub>60</sub> N <sub>3</sub> NaO <sub>17</sub> | C <sub>48</sub> H <sub>42</sub> O <sub>17</sub> |
| Guest species                                                                                                                                                                                                                                                                                                                             | H <sub>2</sub> O                                | Na <sup>+</sup> , DMF                                                     | Na <sup>+</sup> , DMF                                            | H <sub>2</sub> O                                |
| Formula weight                                                                                                                                                                                                                                                                                                                            | 604.59                                          | 1119.62                                                                   | 1082.07                                                          | 890.81                                          |
| Temperature/K                                                                                                                                                                                                                                                                                                                             | 223                                             | 293                                                                       | 293                                                              | 298                                             |
| Crystal system                                                                                                                                                                                                                                                                                                                            | Monoclinic                                      | triclinic                                                                 | triclinic                                                        | orthorhombic                                    |
| Space group                                                                                                                                                                                                                                                                                                                               | <i>P</i> 2 <sub>1</sub> / <i>n</i>              | <i>P</i> -1                                                               | <i>P</i> -1                                                      | <i>Cmc</i> 2 <sub>1</sub>                       |
| <i>a</i> / Å                                                                                                                                                                                                                                                                                                                              | 13.6633(2)                                      | 11.3113(2)                                                                | 13.1094 (8)                                                      | 27.4687(10)                                     |
| <i>b</i> / Å                                                                                                                                                                                                                                                                                                                              | 8.2601(1)                                       | 13.4267(2)                                                                | 25.3405(16)                                                      | 20.3236(8)                                      |
| <i>c</i> / Å                                                                                                                                                                                                                                                                                                                              | 26.8789(6)                                      | 21.7047(4)                                                                | 26.7457(16)                                                      | 8.0251(6)                                       |
| $\alpha$ / °                                                                                                                                                                                                                                                                                                                              | 90                                              | 104.103(2)                                                                | 105.281(5)                                                       | 90                                              |
| $\beta$ / °                                                                                                                                                                                                                                                                                                                               | 90.208(2)                                       | 95.2670(10)                                                               | 90.128(5)                                                        | 90                                              |
| $\gamma$ / °                                                                                                                                                                                                                                                                                                                              | 90                                              | 111.048(2)                                                                | 91.834(5)                                                        | 90                                              |
| <i>V</i> / Å <sup>3</sup>                                                                                                                                                                                                                                                                                                                 | 3033.54(9)                                      | 2924.57(10)                                                               | 8565.8(9)                                                        | 4480.1(4)                                       |
| <i>Z</i>                                                                                                                                                                                                                                                                                                                                  | 4                                               | 2                                                                         | 6                                                                | 4                                               |
| F (000)                                                                                                                                                                                                                                                                                                                                   | 1280                                            | 1138                                                                      | 3408                                                             | 1864                                            |
| F <sup>2</sup>                                                                                                                                                                                                                                                                                                                            | 1.029                                           | 1.059                                                                     | 0.901                                                            | 1.034                                           |
| <i>R</i> <sub>I</sub> <sup>a</sup> , w <i>R</i> <sub>2</sub> <sup>b</sup> [ <i>I</i> > 2σ( <i>I</i> )]                                                                                                                                                                                                                                    | 0.059, 0.184                                    | 0.061, 0.209                                                              | 0.081, 0.352                                                     | 0.094, 0.288                                    |
| CCDC No.                                                                                                                                                                                                                                                                                                                                  | 2057700                                         | 2078832                                                                   | 2078834                                                          | 2078835                                         |
| * <sup>a</sup> <i>R</i> <sub>I</sub> = Σ   <i>F</i> <sub>o</sub>   -   <i>F</i> <sub>c</sub>  /Σ  <i>F</i> <sub>o</sub>  . <sup>b</sup> w <i>R</i> <sub>2</sub> = {Σ[w( <i>F</i> <sub>o</sub> <sup>2</sup> - <i>F</i> <sub>c</sub> <sup>2</sup> ) <sup>2</sup> ]/Σ[w( <i>F</i> <sub>o</sub> <sup>2</sup> ) <sup>2</sup> ]} <sup>1/2</sup> |                                                 |                                                                           |                                                                  |                                                 |

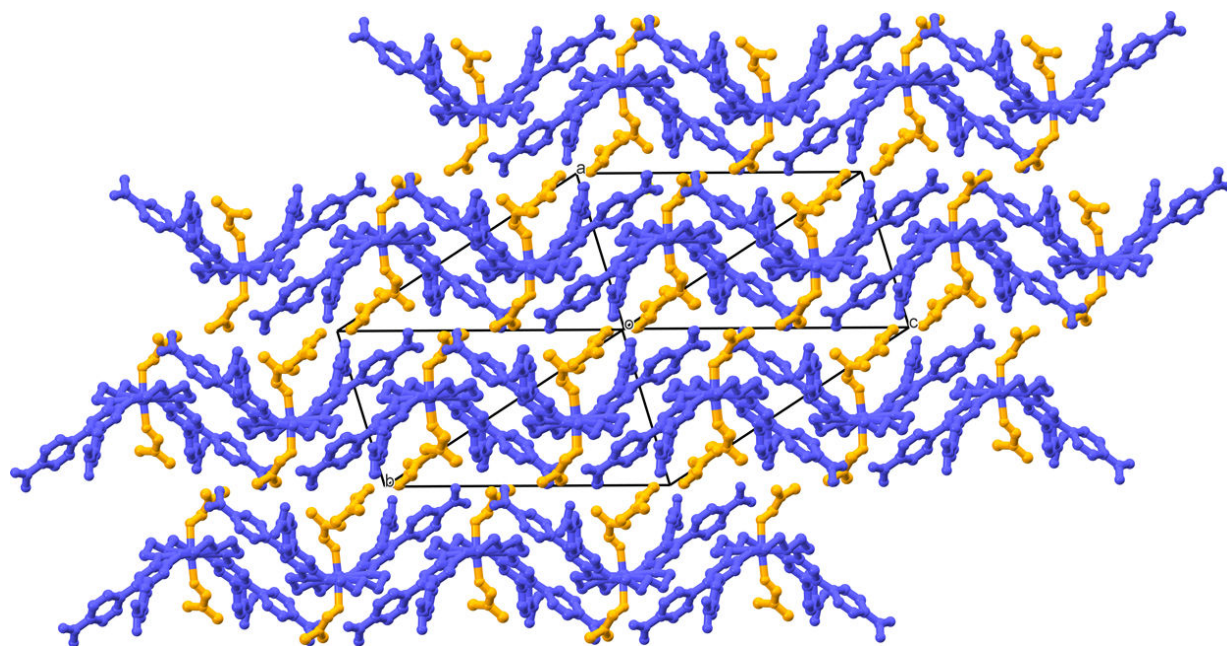

**Fig. S1** Crystal structure of **2CT-18C6-II**.

## Section 4. Impedance Spectroscopy

### Nyquist plots<sup>[S2-S4]</sup>

#### 1CT-18C6-I

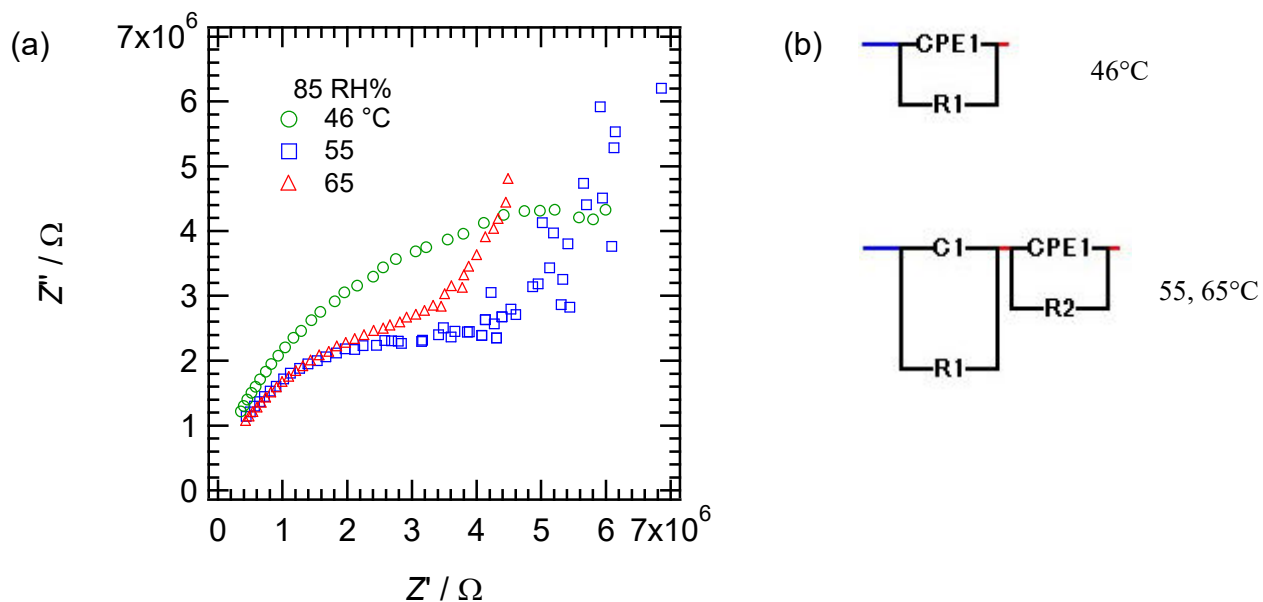

**Fig. S2** (a) Nyquist plot for **1CT-18C6-I** at 46, 55, and 65 °C under 85 RH% humidity and (b) equivalent circuit models for the fitting to data of 46 °C (top) and 55 and 65 °C (bottom).

**Table S2.** Fitting parameters of equivalent circuit model at each temperature for **1CT-18C6-I**.

| $T / ^\circ\text{C}$ | $R_1 / \Omega$       | $C_1$ or $CPE_1 / \text{F}^{n_1}$ | $n_1$ | $R_2 / \Omega$      | $C_2 / \text{F}$        |
|----------------------|----------------------|-----------------------------------|-------|---------------------|-------------------------|
| 46                   | $1.148 \times 10^7$  | $2.025 \times 10^{-12}$           | 0.822 | ---                 | ---                     |
| 55                   | $5.4385 \times 10^6$ | $1.639 \times 10^{-12}$           | 0.839 | $3.297 \times 10^7$ | $3.538 \times 10^{-12}$ |
| 65                   | $4.420 \times 10^6$  | $1.329 \times 10^{-12}$           | 0.852 | $3.718 \times 10^7$ | $1.329 \times 10^{-12}$ |

# 4,4'-Dicarboxy-o-tephenyl (CT)

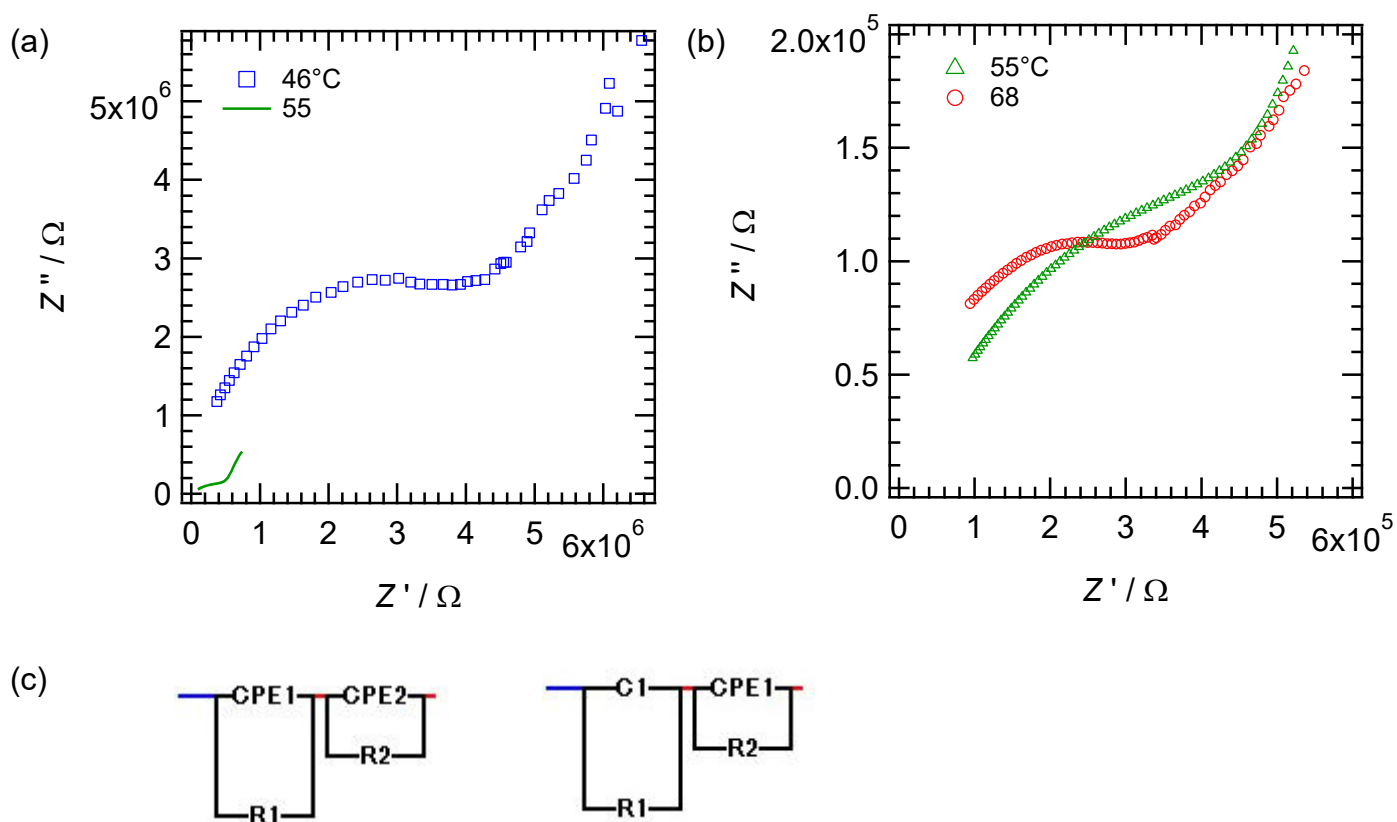

**Fig. S3** (a) Nyquist plot for CT at 46, 55, and 68 °C under 85 RH% humidity and (b) equivalent circuit models for the fitting to data of 46 °C (top) and 55 and 68 °C (bottom).

**Table S3.** Fitting parameters of equivalent circuit model at each temperature for 4,4'-Dicarboxy-o-tephenyl (CT).

| $T / ^\circ\text{C}$ | $R_1 / \Omega$      | $C_1$ or $CPE_1 / \text{F}^{n_1}$ | $n_1$ | $R_2 / \Omega$      | $C_2$ or $CPE_2 / \text{F}^{n_2}$ | $n_2$ |
|----------------------|---------------------|-----------------------------------|-------|---------------------|-----------------------------------|-------|
| 46                   | $4.594 \times 10^6$ | $1.472 \times 10^{-13}$           | ---   | $1.491 \times 10^7$ | $1.604 \times 10^{-12}$           | ---   |
| 55                   | $6.584 \times 10^5$ | $8.921 \times 10^{-9}$            | 0.433 | $1.776 \times 10^6$ | $9.584 \times 10^{-10}$           | ---   |
| 68                   | $2.876 \times 10^5$ | $4.026 \times 10^{-10}$           | 0.631 | $1501 \times 10^6$  | $3.793 \times 10^{-8}$            | 0.451 |

# Dibenzo[18]crown-6 (DB18C6)

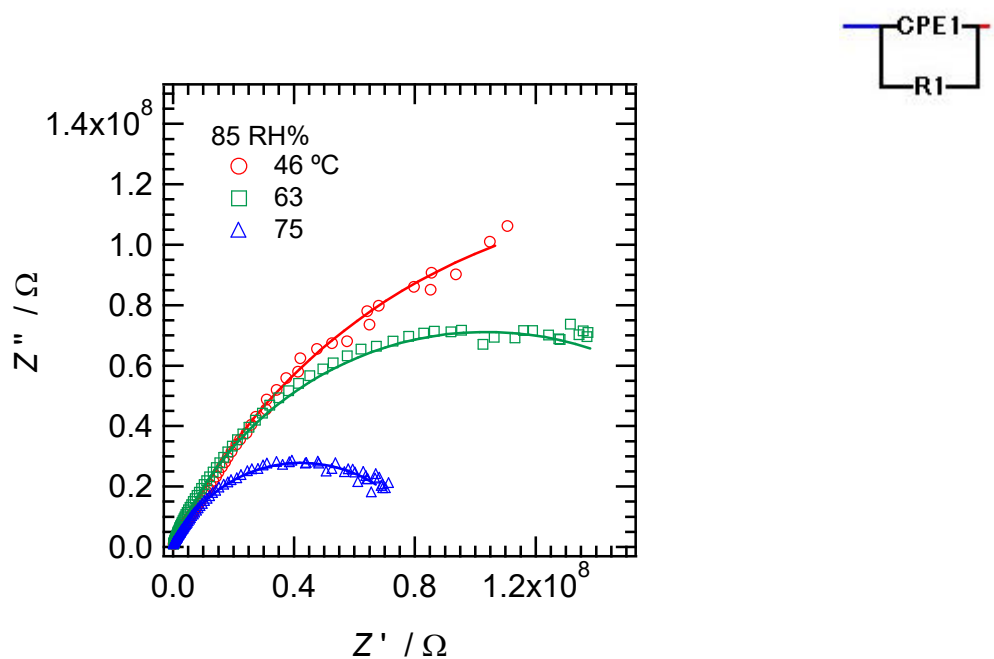

**Fig. S4** (a) Nyquist plot for DB18C6 at 46, 63, and 75 °C under 85 RH% humidity and (b) equivalent circuit models for the fitting to data.

**Table S4.** Fitting parameters of equivalent circuit model at each temperature for DB18C6.

| $T / ^\circ\text{C}$ | $R_1 / \Omega$      | $CPE_1 / \text{F}^{n_1}$ | $n_1$ |
|----------------------|---------------------|--------------------------|-------|
| 46                   | $3.492 \times 10^8$ | $1.231 \times 10^{-11}$  | 0.727 |
| 63                   | $2.071 \times 10^8$ | $5.191 \times 10^{-12}$  | 0.766 |
| 75                   | $8.473 \times 10^7$ | $1.124 \times 10^{-11}$  | 0.740 |

## 2CT-18C6-III

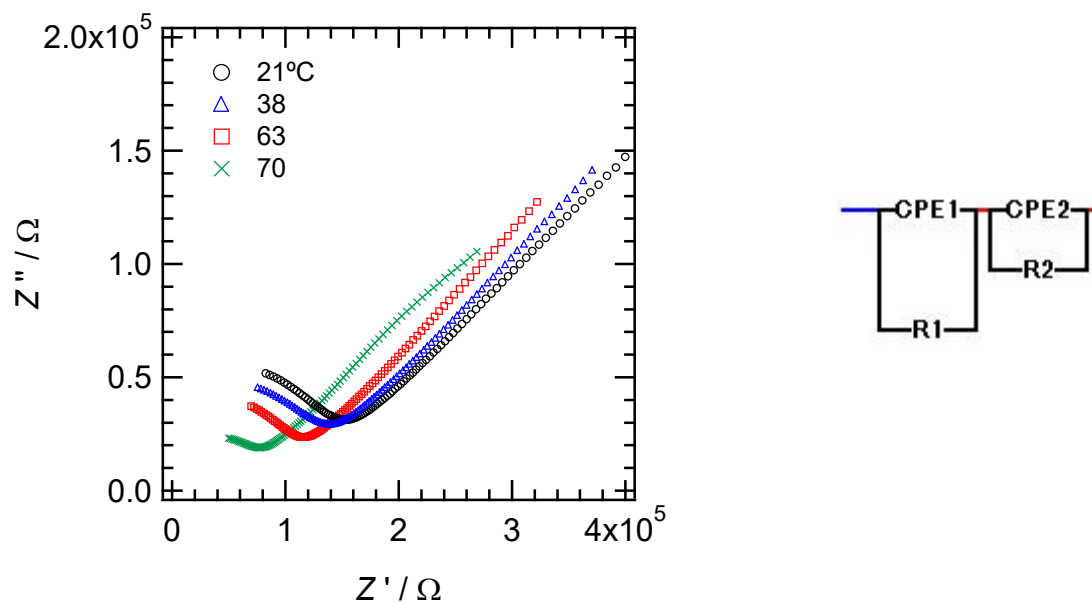

**Fig. S5** (a) Nyquist plot for **2CT-18C6-III** at 25, 63, 66, and 75 °C under 85 RH% humidity and (b) equivalent circuit models for the fitting to data.

**Table S5.** Fitting parameters of equivalent circuit model at each temperature for **2CT-18C6-III**.

| $T / ^\circ\text{C}$ | $R_1 / \Omega$      | $CPE_1 / \text{F}^{n_1}$ | $n_1$ | $R_2 / \Omega$         | $CPE_2 / \text{F}^{n_2}$ | $n_2$ |
|----------------------|---------------------|--------------------------|-------|------------------------|--------------------------|-------|
| 21                   | $1.138 \times 10^5$ | $2.591 \times 10^{-11}$  | 0.803 | $2.818 \times 10^6$    | $3.788 \times 10^{-7}$   | 0.312 |
| 38                   | $1.040 \times 10^5$ | $5.245 \times 10^{-11}$  | 0.764 | $1.000 \times 10^{10}$ | $4.666 \times 10^{-7}$   | 0.304 |
| 66                   | $6.712 \times 10^4$ | $3.903 \times 10^{-10}$  | 0.642 | $6.474 \times 10^5$    | $6.876 \times 10^{-8}$   | 0.456 |
| 70                   | $6.432 \times 10^4$ | $3.940 \times 10^{-10}$  | 0.651 | $1.895 \times 10^6$    | $4.170 \times 10^{-10}$  | 0.346 |

**Activation Energy calculation based on Arrhenius law.**

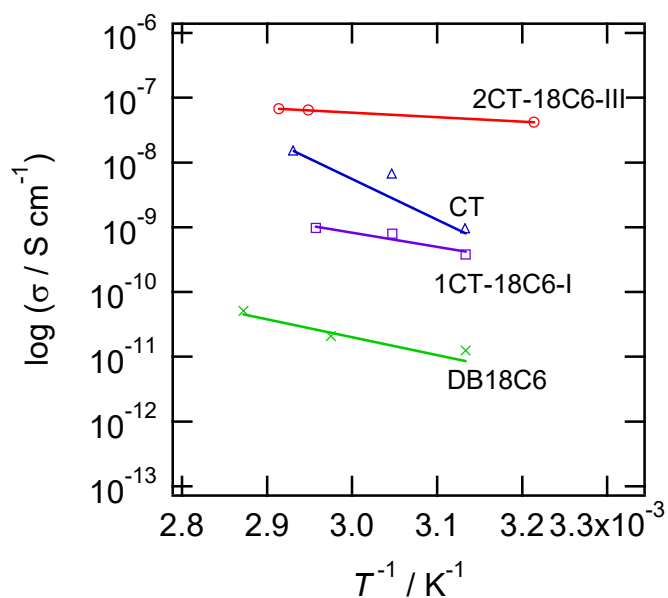

**Fig. S6** Arrhenius plot of proton conductivity under 85 RH%.

**Table S6.** Pre-exponential Factor ( $\sigma_0$ ) and activation energies ( $E_a$ ) of proton conductivity for **1CT-18C6-I**, **2CT-18C6-III**, CT, and DB18C6 under 85 RH%.

|              | $\sigma_0$             | $E_a / \text{kJ mol}^{-1}$ | $E_a / \text{eV}$ |
|--------------|------------------------|----------------------------|-------------------|
| 1CT-18C6-I   | $2.02 \times 10^{-5}$  | 44.8                       | 0.354             |
| 2CT-18C6-III | $1.66 \times 10^{-2}$  | 13.4                       | 0.140             |
| CT           | $2.04 \times 10^{-21}$ | 110.9                      | 1.150             |
| DB18C6       | $1.70 \times 10^{-9}$  | 43.6                       | 0.452             |

## Section 5. $^1\text{H}$ and $^{13}\text{C}$ NMR Spectra

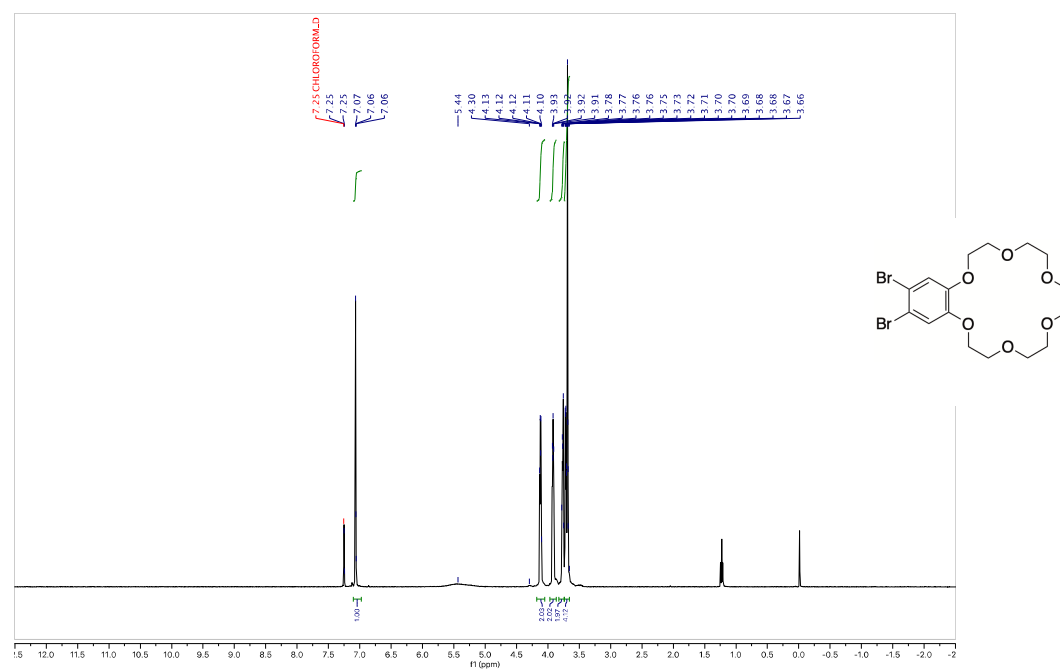

**Fig. S7**  $^1\text{H}$  NMR (400 MHz,  $\text{CDCl}_3$ ) spectrum of 4,5-Dibromodibenzo-18-crown-6.

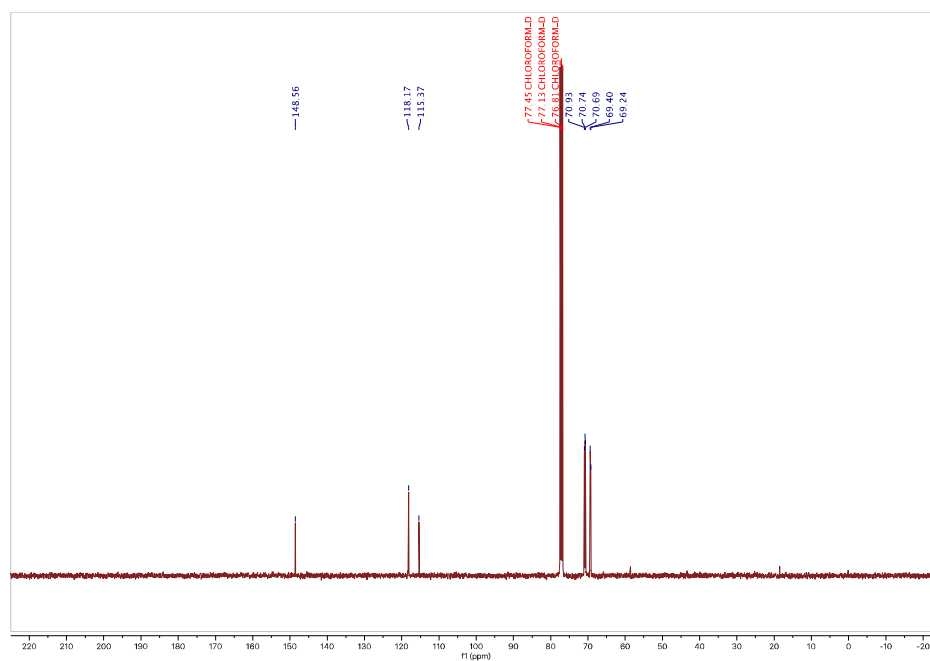

**Fig. S8**  $^{13}\text{C}$  NMR (100 MHz,  $\text{CDCl}_3$ ) spectrum of 4,5-Dibromodibenzo-18-crown-6.

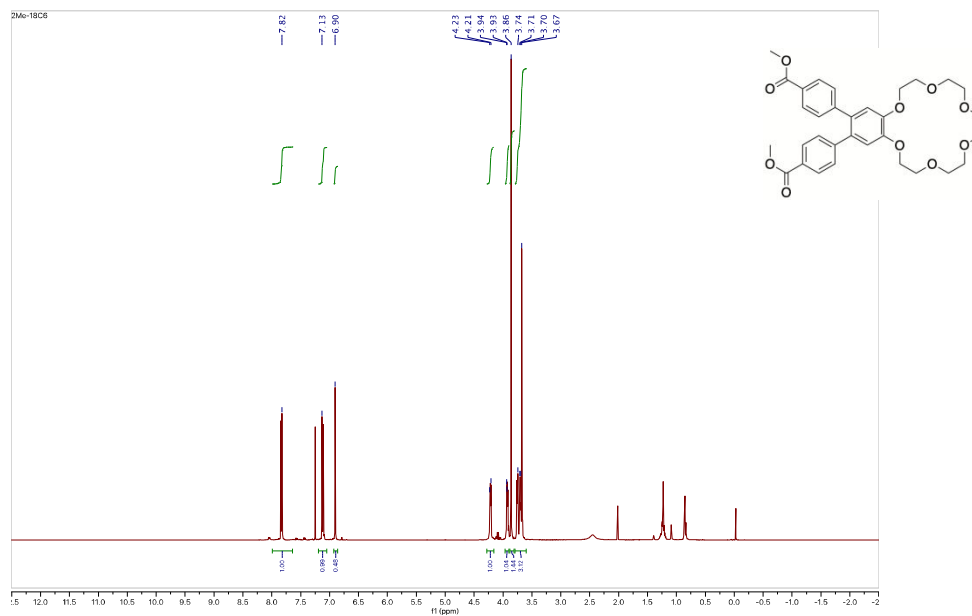

**Fig. S9**  $^1\text{H}$  NMR (400 MHz,  $\text{CDCl}_3$ ) spectrum of **1**.

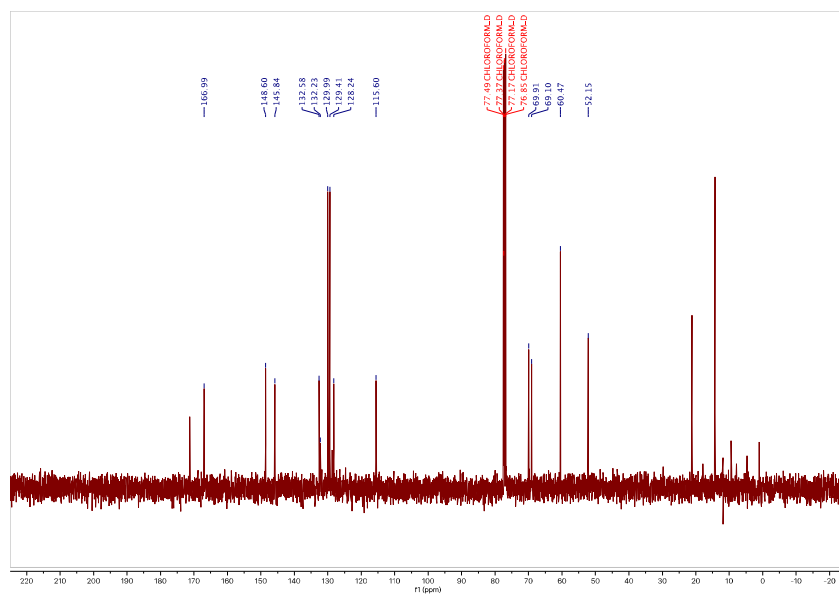

**Fig. S10**  $^{13}\text{C}$  NMR (100 MHz,  $\text{CDCl}_3$ ) spectrum of **1**.

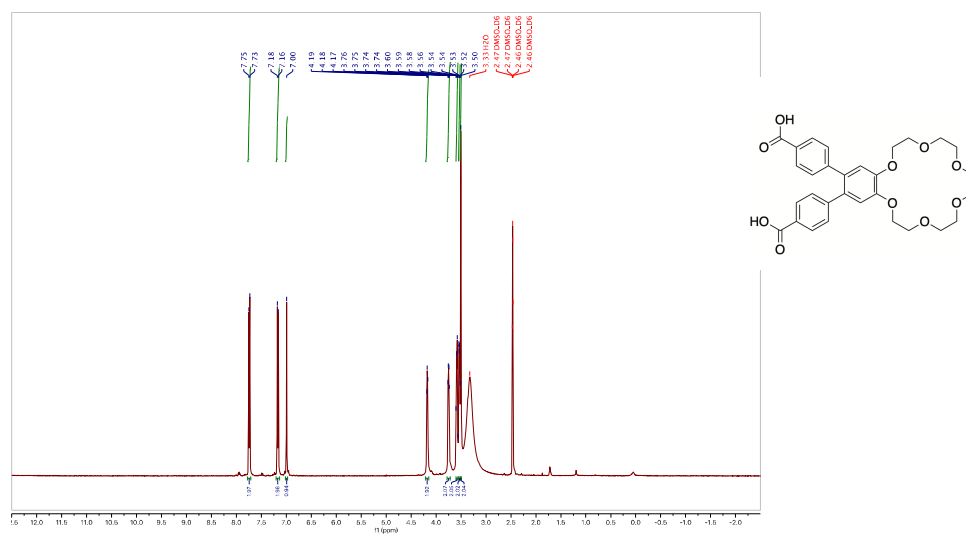

**Fig. S11** <sup>1</sup>H NMR (400 MHz, DMSO-*d*<sub>6</sub>) spectrum of 1CT-18C6.

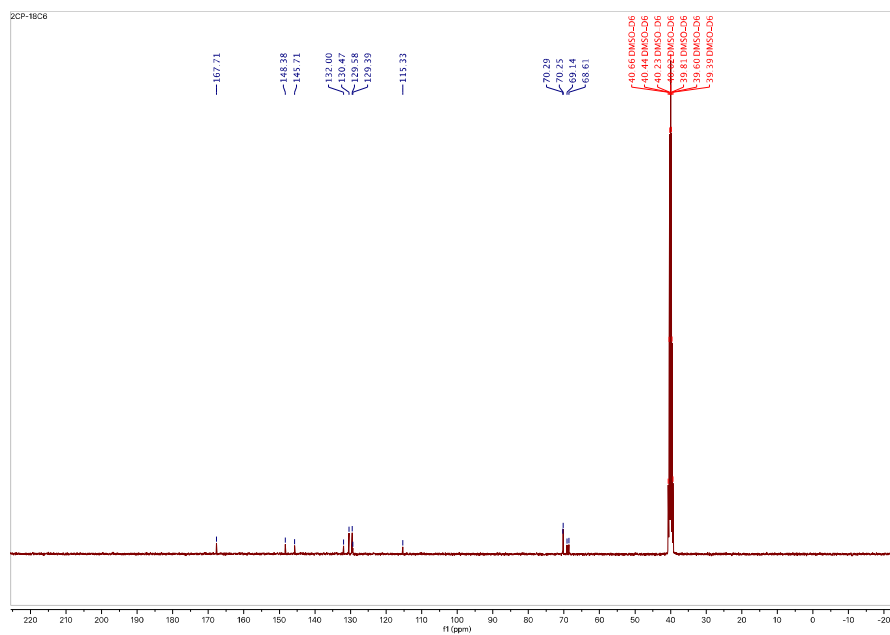

**Fig. S12** <sup>13</sup>C NMR (100 MHz, DMSO-*d*<sub>6</sub>) spectrum of 1CT-18C6.

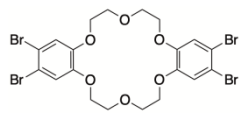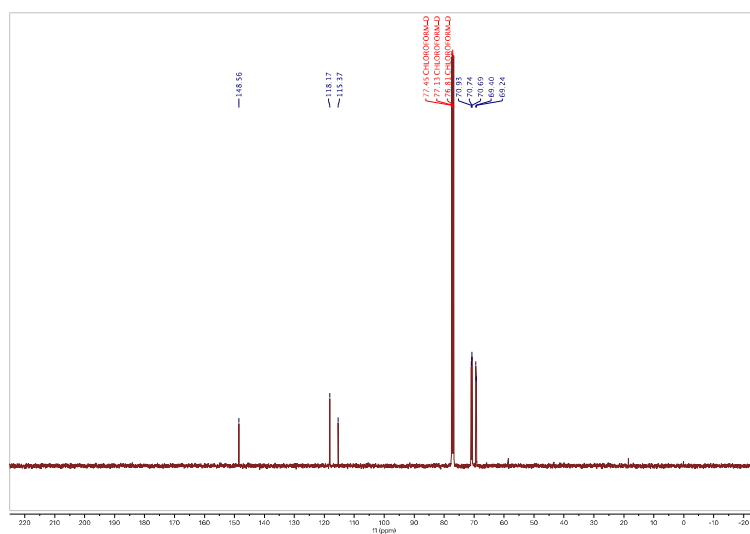

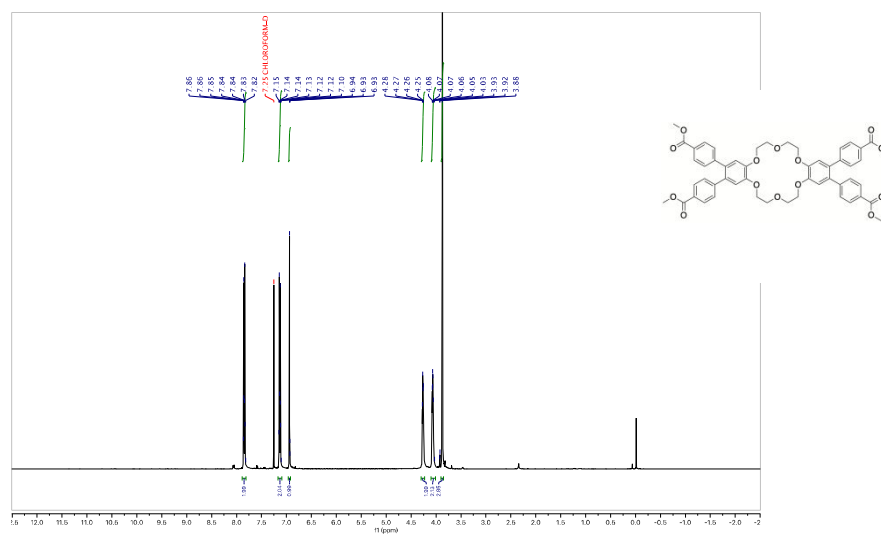

**Fig. S15**  $^1\text{H}$  NMR (400 MHz,  $\text{CDCl}_3$ ) spectrum of **2**.

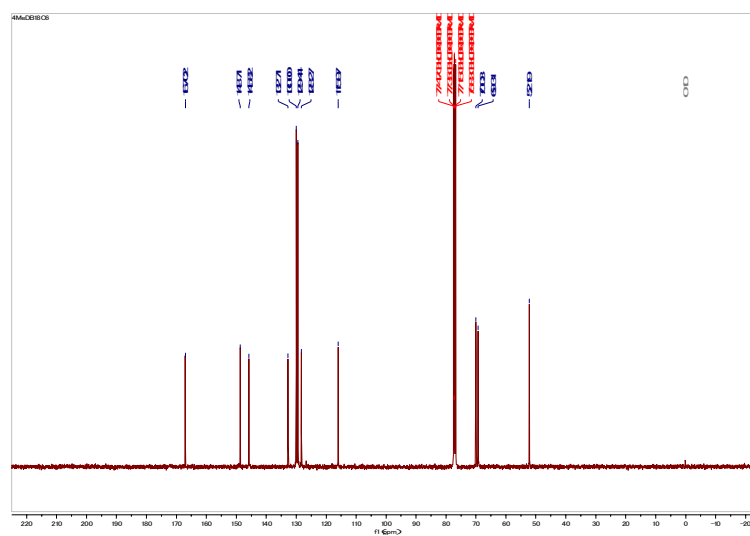

**Fig. S16**  $^{13}\text{C}$  NMR (100 MHz,  $\text{CDCl}_3$ ) spectrum of **2**.

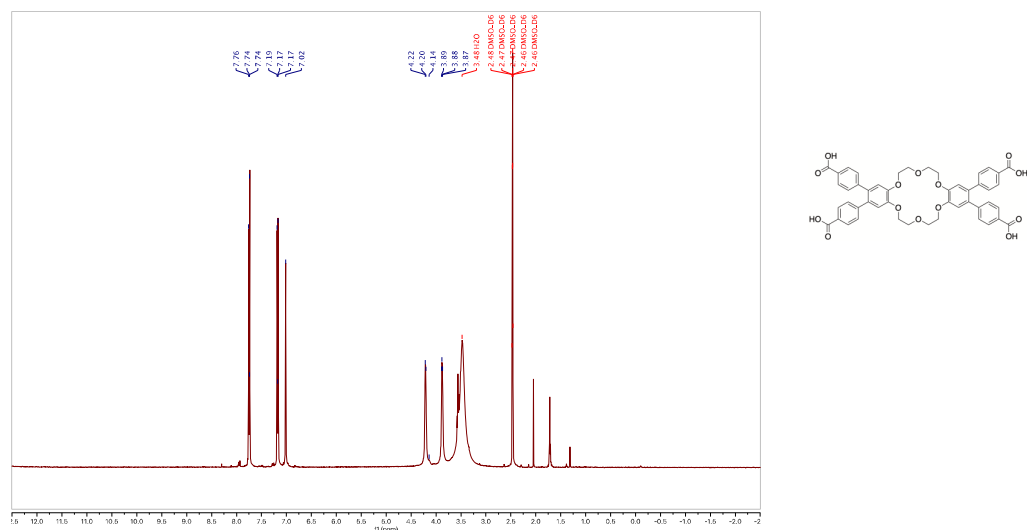

**Fig. S17**  $^1\text{H}$  NMR (400 MHz,  $\text{DMSO-}d_6$ ) spectrum of **2CT-18C6**.

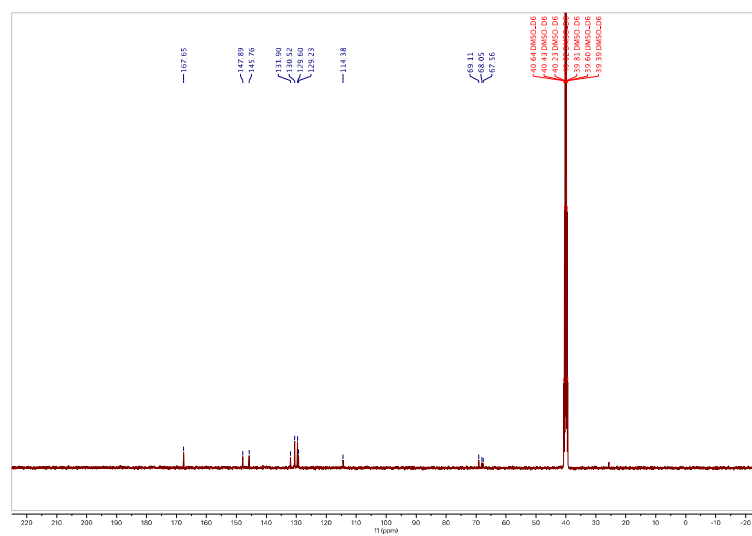

**Fig. S18**  $^{13}\text{C}$  NMR (100 MHz,  $\text{DMSO-}d_6$ ) spectrum of **2CT-18C6**.

## Section 6. References

- S1. Géraud Dubois, Catherine Reyé, Robert J. P. Corriu and Claude Chuit, *J. Mater. Chem.*, 2000, 10, 1091–1098
- S2. Y. Tian, G. Liang, T. Fan, J. Shang, S. Shang, Y. Ma, R. Matsuda, M. Liu, M. Wang, L. Li and S. Kitagawa, *Chem. Mater.*, 2019, 31, 8494–8503.
- S3. P. Rought, C. Marsh, S. Pili, I. P. Silverwood, V. G. Sakai, M. Li, M. S. Brown, S. P. Argent, I. Vitorica Yrezabal, G. Whitehead, M. R. Warren, S. Yang and M. Schröder, *Chem. Sci.*, 2019, 10, 1492–1499.
- S4. D.-W. Lim and H. Kitagawa, *Chem. Rev.*, 2020, 120, 8416–8467.
